# Supplementary material for: Eczema and subsequent suicide: a matched case–control study
Source: PubMed Central journal article supplement — BMJ Open. 2018 Nov 25;8(11):e023776. doi: 10.1136/bmjopen-2018-023776 (PMC6254488; doi:10.1136/bmjopen-2018-023776), 2018-11-25
Supplement: bmjopen-2018-023776supp001.pdf [file bmjopen-2018-023776supp001.pdf]

**Supplementary Table 1. Prevalence of asthma and rhinitis according to history of eczema.**

| <b>Atopic comorbidity</b> | <b>Persistent eczema present<br/>(n = 459 patients)</b> | <b>Persistent eczema absent<br/>(n = 54,864 patients)</b> |
|---------------------------|---------------------------------------------------------|-----------------------------------------------------------|
| <b>Asthma</b>             | 103 (22%)                                               | 5,435 (10%)                                               |
| <b>Rhinitis</b>           | 132 (29%)                                               | 6,028 (11%)                                               |

Comorbidities defined by truncated ICD-9 codes: asthma (493), rhinitis (477)

**Supplementary figure 1. Distribution of the derived suicide predilection score according to history of eczema.**

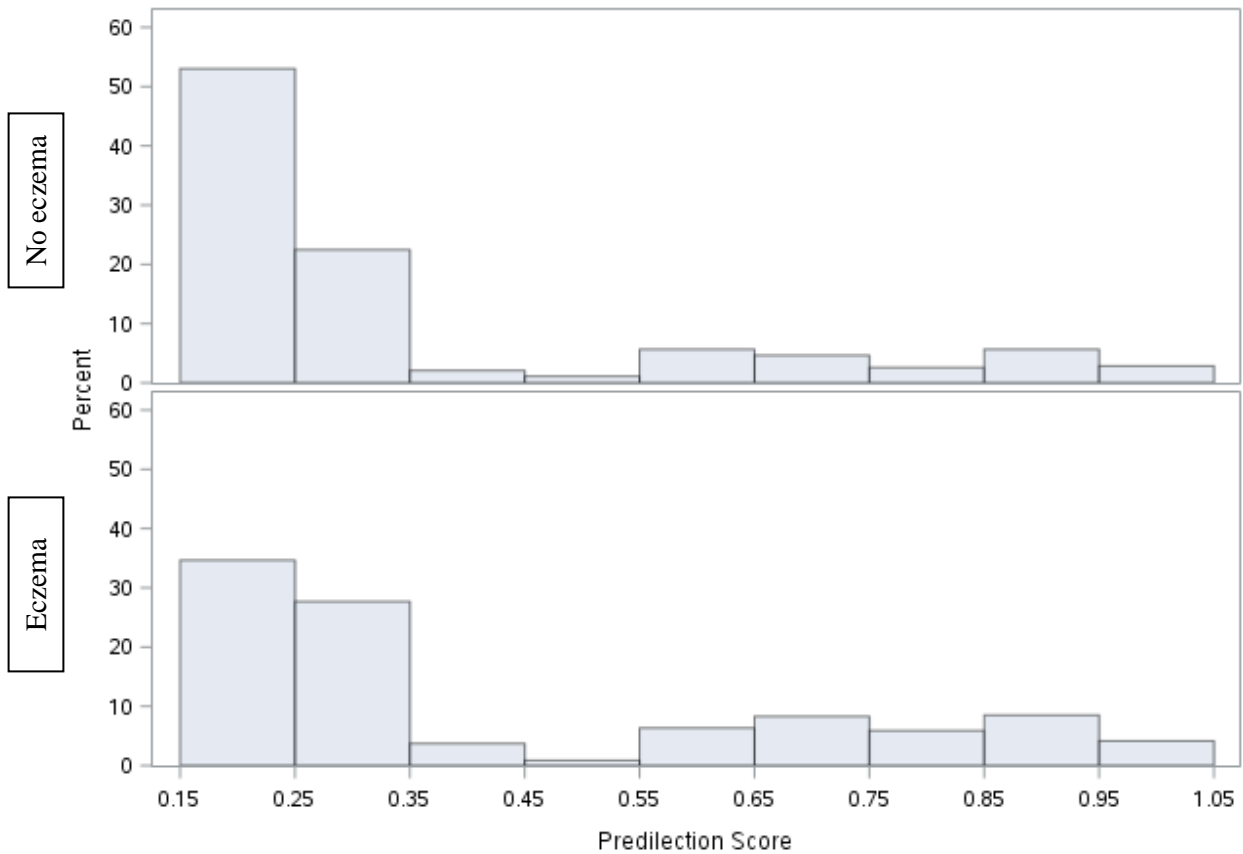

Low scores represent a lower risk for suicide based on the patient's history of mental health, sleep and substance disorders and high scores represent a higher risk. Main findings are that patients with persistent eczema have generally higher suicide predilection scores than patients without persistent eczema.

**Supplementary figure 2. Association of eczema with suicide when different definitions of eczema are applied.**

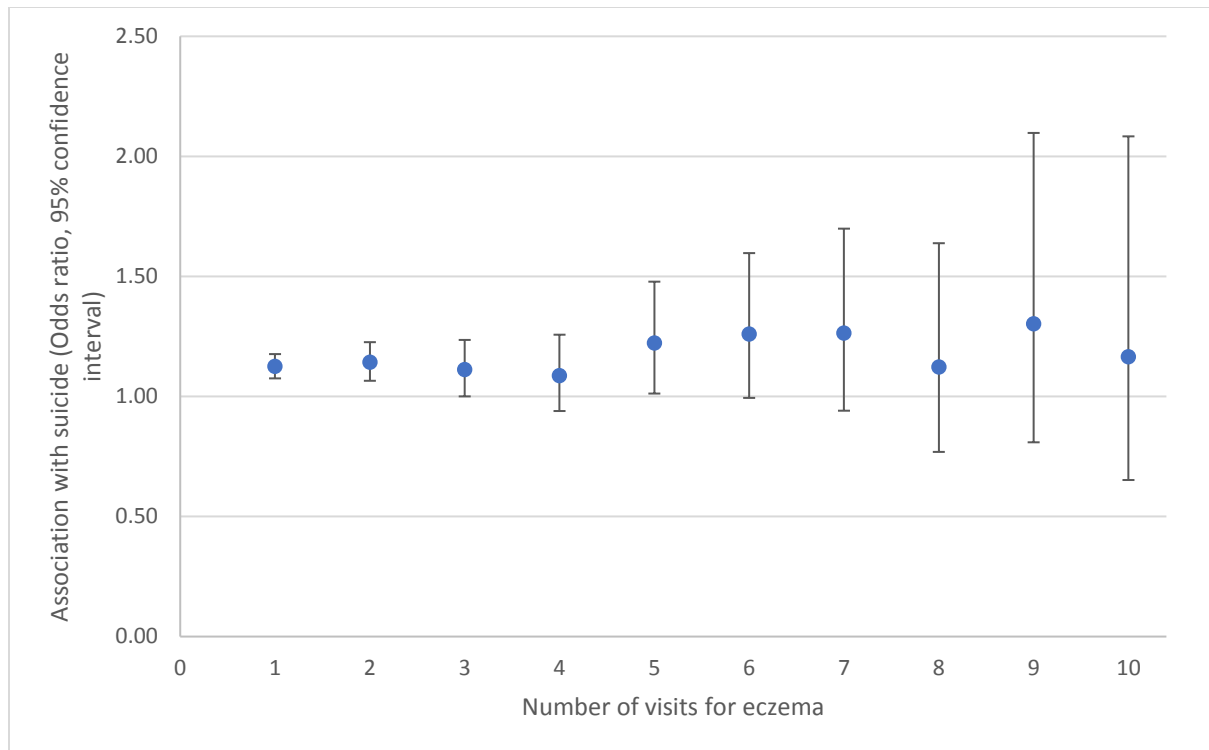

Eczema cases are defined by the presence of number of physician visits for diagnostic code 691, including patients with the given number of visits or more. The primary predictor is 5 or more visits for eczema. Results are presented as odds ratios (dots) and 95% confidence intervals (lines and bars).
